# Supplementary material for: Molecular and evolutionary characterization of norovirus GII.17 in the northern region of Brazil
Source: Springer Nature journal article supplement (doi:10.1186/s12879-019-4628-5), 2019-12-01

Consensus  
Identity

1. LC043139/Hu/GII/JP/2014/GII.P17/Nagano7-1
2. KT285173/Hu/GII.P17 GII.17/NSW6016/2014/AU
3. Nov/Hu/GIIP17/POL/AM16-219/BRAZIL\_AM/2016
4. Nov/Hu/GIIP17/POL/AM16-300/BRAZIL\_AM/2016
5. Nov/Hu/GIIP17/POL/AM15-438/BRAZIL\_AM/2015
6. Nov/Hu/GIIP17/POL/16017/BRAZIL\_PA/2016
7. Nov/Hu/GIIP17/POL/16015/BRAZIL\_PA/2016
8. Nov/Hu/GIIP17/POL/16007/BRAZIL\_PA/2016
9. Nov/Hu/GIIP17/POL/16004/BRAZIL\_PA/2016
10. Nov/Hu/GIIP17/POL/AM16-297/BRAZIL\_AM/2016
11. Nov/Hu/GII17/VP1/AM16-275/BRAZIL\_AM/2016
12. Nov/Hu/GIIP17/POL/AM16-313/BRAZIL\_AM/2016
13. Nov/Hu/GIIP17/POL/16005/BRAZIL\_PA/2016
14. Nov/Hu/GIIP17/POL/16009/BRAZIL\_PA/2016

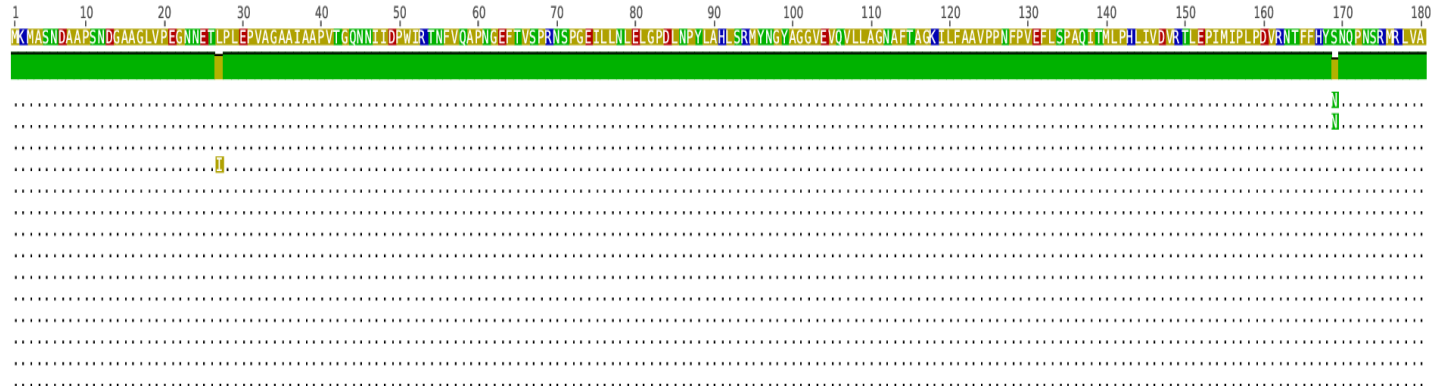

Consensus  
Identity

1. LC043139/Hu/GII/JP/2014/GII.P17/Nagano7-1
2. KT285173/Hu/GII.P17 GII.17/NSW6016/2014/AU
3. Nov/Hu/GIIP17/POL/AM16-219/BRAZIL\_AM/2016
4. Nov/Hu/GIIP17/POL/AM16-300/BRAZIL\_AM/2016
5. Nov/Hu/GIIP17/POL/AM15-438/BRAZIL\_AM/2015
6. Nov/Hu/GIIP17/POL/16017/BRAZIL\_PA/2016
7. Nov/Hu/GIIP17/POL/16015/BRAZIL\_PA/2016
8. Nov/Hu/GIIP17/POL/16007/BRAZIL\_PA/2016
9. Nov/Hu/GIIP17/POL/16004/BRAZIL\_PA/2016
10. Nov/Hu/GIIP17/POL/AM16-297/BRAZIL\_AM/2016
11. Nov/Hu/GII17/VP1/AM16-275/BRAZIL\_AM/2016
12. Nov/Hu/GIIP17/POL/AM16-313/BRAZIL\_AM/2016
13. Nov/Hu/GIIP17/POL/16005/BRAZIL\_PA/2016
14. Nov/Hu/GIIP17/POL/16009/BRAZIL\_PA/2016

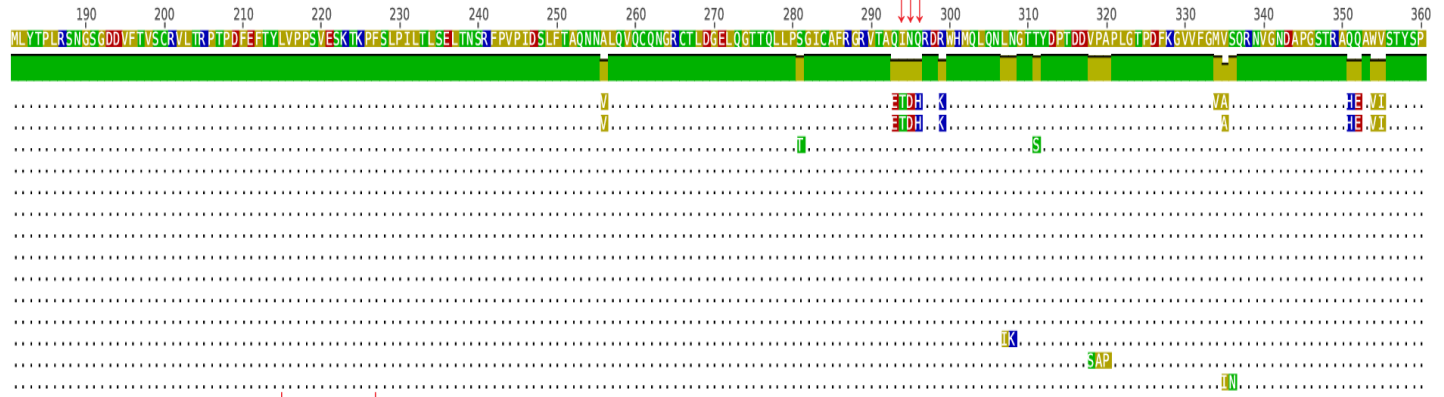

Consensus  
Identity

1. LC043139/Hu/GII/JP/2014/GII.P17/Nagano7-1
2. KT285173/Hu/GII.P17 GII.17/NSW6016/2014/AU
3. Nov/Hu/GIIP17/POL/AM16-219/BRAZIL\_AM/2016
4. Nov/Hu/GIIP17/POL/AM16-300/BRAZIL\_AM/2016
5. Nov/Hu/GIIP17/POL/AM15-438/BRAZIL\_AM/2015
6. Nov/Hu/GIIP17/POL/16017/BRAZIL\_PA/2016
7. Nov/Hu/GIIP17/POL/16015/BRAZIL\_PA/2016
8. Nov/Hu/GIIP17/POL/16007/BRAZIL\_PA/2016
9. Nov/Hu/GIIP17/POL/16004/BRAZIL\_PA/2016
10. Nov/Hu/GIIP17/POL/AM16-297/BRAZIL\_AM/2016
11. Nov/Hu/GII17/VP1/AM16-275/BRAZIL\_AM/2016
12. Nov/Hu/GIIP17/POL/AM16-313/BRAZIL\_AM/2016
13. Nov/Hu/GIIP17/POL/16005/BRAZIL\_PA/2016
14. Nov/Hu/GIIP17/POL/16009/BRAZIL\_PA/2016

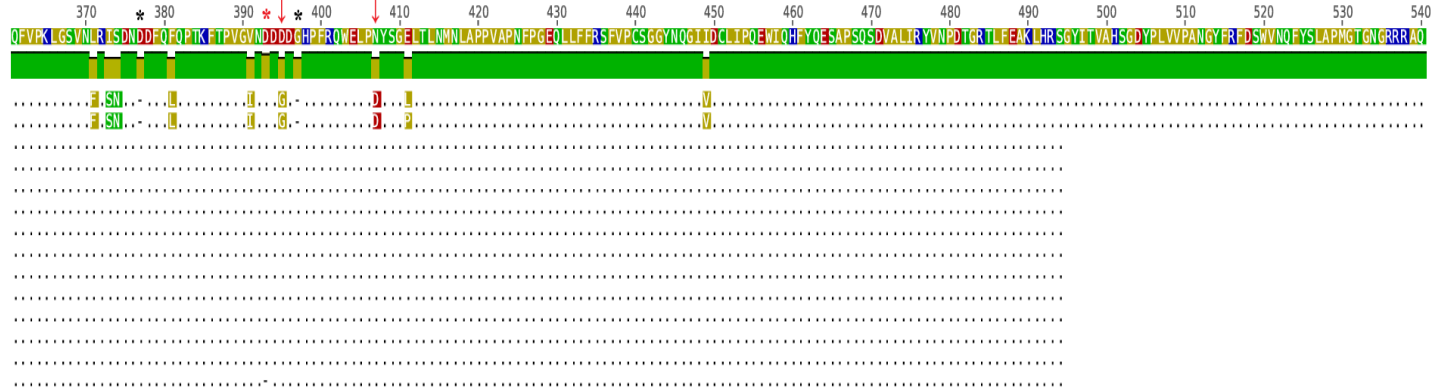

Supplement: MOESM3 [file 17459672]
