# Supplementary material for: Molecular and evolutionary characterization of norovirus GII.17 in the northern region of Brazil
Source: Springer Nature journal article supplement (doi:10.1186/s12879-019-4628-5), 2019-12-01
Supplement: MOESM4 [file 17459672]

# Ramachandran Plot

## 7592006

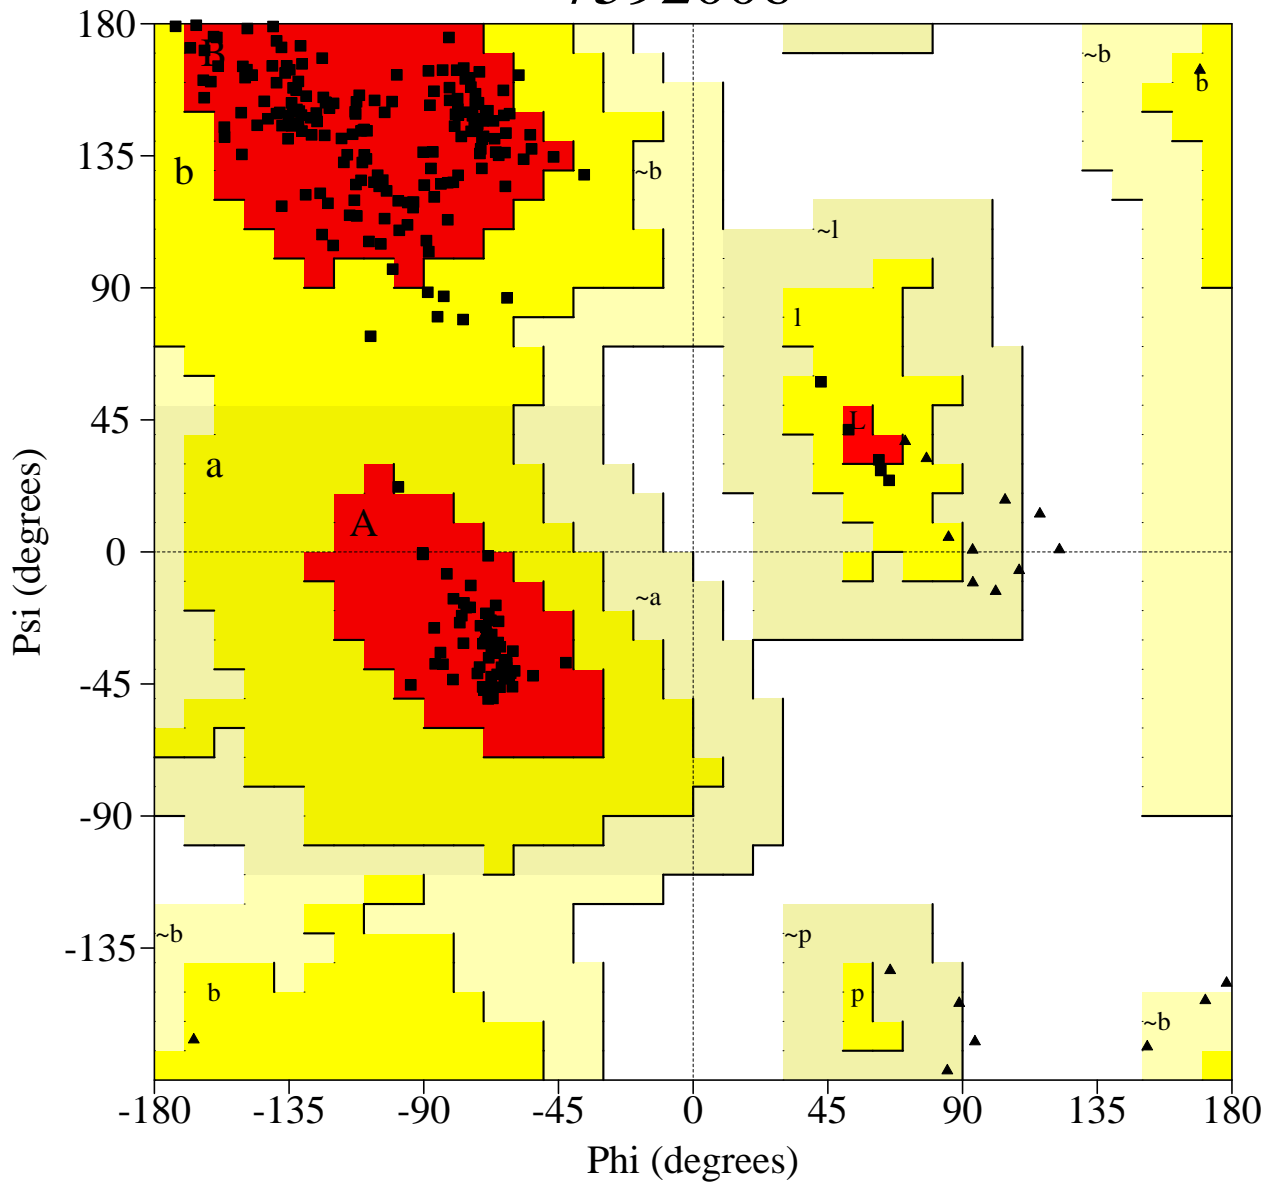

### Plot statistics

|                                                      |     |        |
|------------------------------------------------------|-----|--------|
| Residues in most favoured regions [A,B,L]            | 213 | 94.2%  |
| Residues in additional allowed regions [a,b,l,p]     | 13  | 5.8%   |
| Residues in generously allowed regions [~a,~b,~l,~p] | 0   | 0.0%   |
| Residues in disallowed regions                       | 0   | 0.0%   |
| -----                                                |     |        |
| Number of non-glycine and non-proline residues       | 226 | 100.0% |
| Number of end-residues (excl. Gly and Pro)           | 2   |        |
| Number of glycine residues (shown as triangles)      | 20  |        |
| Number of proline residues                           | 24  |        |
| -----                                                |     |        |
| Total number of residues                             | 272 |        |

Based on an analysis of 118 structures of resolution of at least 2.0 Angstroms and R-factor no greater than 20%, a good quality model would be expected to have over 90% in the most favoured regions.
